# Supplementary material
Source: publisher figshare collection journal article supplement (https://acs.figshare.com/ndownloader/files/22519775)
Supplement: Supplementary file 1 [file 22519775]

Compound	SMILES	DC50(μM)
11a	O[C@@H](C[C@H](CC(O)=O)O)CCN1C(C2=CC=C(F)C=C2)=C(C3=CC=CC(OCCCC4=CN(CCOCCNC5=CC=CC(C(N6C7CCC(NC7=O)=O)=O)=C5C6=O)N=N4)=C3)C(C(NC8=CC=CC=C8)=O)=C1C(C)C	>3
11b	O[C@@H](C[C@H](CC(O)=O)O)CCN1C(C2=CC=C(F)C=C2)=C(C3=CC=CC(OCCCCC4=CN(CCOCCNC5=CC=CC(C(N6C7CCC(NC7=O)=O)=O)=C5C6=O)N=N4)=C3)C(C(NC8=CC=CC=C8)=O)=C1C(C)C	>3
11c	O[C@@H](C[C@H](CC(O)=O)O)CCN1C(C2=CC=C(F)C=C2)=C(C3=CC=CC(OCCCCCC4=CN(CCOCCNC5=CC=CC(C(N6C7CCC(NC7=O)=O)=O)=C5C6=O)N=N4)=C3)C(C(NC8=CC=CC=C8)=O)=C1C(C)C	3
11d	O[C@@H](C[C@H](CC(O)=O)O)CCN1C(C2=CC=C(F)C=C2)=C(C3=CC=CC(OCCCC4=CN(CCOCCOCCNC5=C(C(N(C6C(NC(CC6)=O)=O)C7=O)=O)C7=CC=C5)N=N4)=C3)C(C(NC8=CC=CC=C8)=O)=C1C(C)C	>3
11e	O[C@@H](C[C@H](CC(O)=O)O)CCN1C(C2=CC=C(F)C=C2)=C(C3=CC=CC(OCCCCC4=CN(CCOCCOCCNC5=C(C(N(C6C(NC(CC6)=O)=O)C7=O)=O)C7=CC=C5)N=N4)=C3)C(C(NC8=CC=CC=C8)=O)=C1C(C)C	>3
11f	O[C@@H](C[C@H](CC(O)=O)O)CCN1C(C2=CC=C(F)C=C2)=C(C3=CC=CC(OCCCCCC4=CN(CCOCCOCCNC5=C(C(N(C6C(NC(CC6)=O)=O)C7=O)=O)C7=CC=C5)N=N4)=C3)C(C(NC8=CC=CC=C8)=O)=C1C(C)C	>3
11g	O[C@@H](C[C@H](CC(O)=O)O)CCN1C(C2=CC=C(F)C=C2)=C(C3=CC=CC(OCCCC4=CN(CCOCCOCCOCCNC5=CC=CC(C(N6C7CCC(NC7=O)=O)=O)=C5C6=O)N=N4)=C3)C(C(NC8=CC=CC=C8)=O)=C1C(C)C	>3
11h	O[C@@H](C[C@H](CC(O)=O)O)CCN1C(C2=CC=C(F)C=C2)=C(C3=CC=CC(OCCCCC4=CN(CCOCCOCCOCCNC5=C(C(N(C6C(NC(CC6)=O)=O)C7=O)=O)C7=CC=C5)N=N4)=C3)C(C(NC8=CC=CC=C8)=O)=C1C(C)C	>3
11i	O[C@@H](C[C@H](CC(O)=O)O)CCN1C(C2=CC=C(F)C=C2)=C(C3=CC=CC(OCCCCCC4=CN(CCOCCOCCOCCNC5=C(C(N(C6C(NC(CC6)=O)=O)C7=O)=O)C7=CC=C5)N=N4)=C3)C(C(NC8=CC=CC=C8)=O)=C1C(C)C	1.8
11j	O[C@@H](C[C@H](CC(O)=O)O)CCN1C(C2=CC=C(F)C=C2)=C(C3=CC=CC(OCCCC4=CN(CCOCCOCCOCCOCCNC5=C(C(N(C6C(NC(CC6)=O)=O)C7=O)=O)C7=CC=C5)N=N4)=C3)C(C(NC8=CC=CC=C8)=O)=C1C(C)C	0.1
11k	O[C@@H](C[C@H](CC(O)=O)O)CCN1C(C2=CC=C(F)C=C2)=C(C3=CC=CC(OCCCC4=CN(CCOCCOCCOCCOCCNC5=C(C(N(C6C(N(CC)C(CC6)=O)=O)C7=O)=O)C7=CC=C5)N=N4)=C3)C(C(NC8=CC=CC=C8)=O)=C1C(C)C	>3
11l	O[C@@H](C[C@H](CC(O)=O)O)CCN1C(C2=CC=C(F)C=C2)=C(C3=CC=CC(OCCCCC4=CN(CCOCCOCCOCCOCCNC5=C(C(N(C6C(NC(CC6)=O)=O)C7=O)=O)C7=CC=C5)N=N4)=C3)C(C(NC8=CC=CC=C8)=O)=C1C(C)C	0.4
11m	O[C@@H](C[C@H](CC(O)=O)O)CCN1C(C2=CC=C(F)C=C2)=C(C3=CC=CC(OCCCCCC4=CN(CCOCCOCCOCCOCCNC5=C(C(N(C6C(NC(CC6)=O)=O)C7=O)=O)C7=CC=C5)N=N4)=C3)C(C(NC8=CC=CC=C8)=O)=C1C(C)C	0.5
11n	O[C@@H](C[C@H](CC(O)=O)O)CCN1C(C2=CC=C(F)C=C2)=C(C3=CC=CC(OCCCC4=CN(CCOCCOCCOCCOCCOCCNC5=C(C(N(C6C(NC(CC6)=O)=O)C7=O)=O)C7=CC=C5)N=N4)=C3)C(C(NC8=CC=CC=C8)=O)=C1C(C)C	0.2
11o	O[C@@H](C[C@H](CC(O)=O)O)CCN1C(C2=CC=C(F)C=C2)=C(C3=CC=CC(OCCCCC4=CN(CCOCCOCCOCCOCCOCCNC5=C(C(N(C6C(NC(CC6)=O)=O)C7=O)=O)C7=CC=C5)N=N4)=C3)C(C(NC8=CC=CC=C8)=O)=C1C(C)C	>3
11p	O[C@@H](C[C@H](CC(O)=O)O)CCN1C(C2=CC=C(F)C=C2)=C(C3=CC=CC(OCCCCCC4=CN(CCOCCOCCOCCOCCOCCNC5=C(C(N(C6C(NC(CC6)=O)=O)C7=O)=O)C7=CC=C5)N=N4)=C3)C(C(NC8=CC=CC=C8)=O)=C1C(C)C	0.6
12a	O=C(O)C[C@H](O)C[C@H](O)CCN1C(C2=CC=C(F)C=C2)=C(C3=CC=CC(OCC4=CN(CCCCCCCNC5=CC=CC(C(N6C(CC7)C(NC7=O)=O)=O)=C5C6=O)N=N4)=C3)C(C(NC8=CC=CC=C8)=O)=C1C(C)C	N.D.
12b	O=C(O)C[C@H](O)C[C@H](O)CCN1C(C2=CC=C(F)C=C2)=C(C3=CC=CC(OCCCC4=CN(CCCCCCNC5=CC=CC(C(N6C(CC7)C(NC7=O)=O)=O)=C5C6=O)N=N4)=C3)C(C(NC8=CC=CC=C8)=O)=C1C(C)C	0.4
12c	O=C(O)C[C@H](O)C[C@H](O)CCN1C(C2=CC=C(F)C=C2)=C(C3=CC=CC(OCCCC4=CN(CCCCCCCNC5=CC=CC(C(N6C(CC7)C(NC7=O)=O)=O)=C5C6=O)N=N4)=C3)C(C(NC8=CC=CC=C8)=O)=C1C(C)C	0.2
12d	O=C(O)C[C@H](O)C[C@H](O)CCN1C(C2=CC=C(F)C=C2)=C(C3=CC=CC(OCCCCC4=CN(CCCCCCCNC5=CC=CC(C(N6C(CC7)C(NC7=O)=O)=O)=C5C6=O)N=N4)=C3)C(C(NC8=CC=CC=C8)=O)=C1C(C)C	0.3
12e	O=C(O)C[C@H](O)C[C@H](O)CCN1C(C2=CC=C(F)C=C2)=C(C3=CC=CC(OCCCCCC4=CN(CCCCCCCNC5=CC=CC(C(N6C(CC7)C(NC7=O)=O)=O)=C5C6=O)N=N4)=C3)C(C(NC8=CC=CC=C8)=O)=C1C(C)C	0.4
12f	O=C(O)C[C@H](O)C[C@H](O)CCN1C(C2=CC=C(F)C=C2)=C(C3=CC=CC(OCCCCCCC4=CN(CCCCCCCNC5=CC=CC(C(N6C(CC7)C(NC7=O)=O)=O)=C5C6=O)N=N4)=C3)C(C(NC8=CC=CC=C8)=O)=C1C(C)C	0.3
12g	O=C(O)C[C@H](O)C[C@H](O)CCN1C(C2=CC=C(F)C=C2)=C(C3=CC=CC(OCCCCCCCC4=CN(CCCCCCCNC5=CC=CC(C(N6C(CC7)C(NC7=O)=O)=O)=C5C6=O)N=N4)=C3)C(C(NC8=CC=CC=C8)=O)=C1C(C)C	0.5
13a	O[C@@H](C[C@H](CC(O)=O)O)CCN1C(C2=CC=C(F)C=C2)=C(C3=CC=CC(OCCCC4=CN(CCOCCOCCOCCNC5=CC6=C(C(N(C7CCC(NC7=O)=O)C6=O)=O)C=C5)N=N4)=C3)C(C(NC8=CC=CC=C8)=O)=C1C(C)C	>3
13b	O[C@@H](C[C@H](CC(O)=O)O)CCN1C(C2=CC=C(F)C=C2)=C(C3=CC=CC(OCCCCC4=CN(CCOCCOCCOCCNC5=CC=C6C(C(N(C7C(NC(CC7)=O)=O)C6=O)=O)=C5)N=N4)=C3)C(C(NC8=CC=CC=C8)=O)=C1C(C)C	>3
13c	O[C@@H](C[C@H](CC(O)=O)O)CCN1C(C2=CC=C(F)C=C2)=C(C3=CC=CC(OCCCCCC4=CN(CCOCCOCCOCCNC5=CC=C6C(C(N(C7C(NC(CC7)=O)=O)C6=O)=O)=C5)N=N4)=C3)C(C(NC8=CC=CC=C8)=O)=C1C(C)C	>3
13d	O[C@@H](C[C@H](CC(O)=O)O)CCN1C(C2=CC=C(F)C=C2)=C(C3=CC=CC(OCCCC4=CN(CCOCCOCCOCCOCCNC5=CC=C6C(C(N(C7C(NC(CC7)=O)=O)C6=O)=O)=C5)N=N4)=C3)C(C(NC8=CC=CC=C8)=O)=C1C(C)C	0.3
13e	O[C@@H](C[C@H](CC(O)=O)O)CCN1C(C2=CC=C(F)C=C2)=C(C3=CC=CC(OCCCCC4=CN(CCOCCOCCOCCOCCNC5=CC=C6C(C(N(C7C(NC(CC7)=O)=O)C6=O)=O)=C5)N=N4)=C3)C(C(NC8=CC=CC=C8)=O)=C1C(C)C	>3
13f	O[C@@H](C[C@H](CC(O)=O)O)CCN1C(C2=CC=C(F)C=C2)=C(C3=CC=CC(OCCCCCC4=CN(CCOCCOCCOCCOCCNC5=CC=C6C(C(N(C7C(NC(CC7)=O)=O)C6=O)=O)=C5)N=N4)=C3)C(C(NC8=CC=CC=C8)=O)=C1C(C)C	>3
14a	O[C@@H](C[C@H](CC(O)=O)O)CCN1C(C2=CC=C(F)C=C2)=C(C3=CC=CC(OCCCC4=CN(CCOCC#CC5=CC=CC6=C5CN(C7C(NC(CC7)=O)=O)C6=O)N=N4)=C3)C(C(NC8=CC=CC=C8)=O)=C1C(C)C	>3
14b	O[C@@H](C[C@H](CC(O)=O)O)CCN1C(C2=CC=C(F)C=C2)=C(C3=CC=CC(OCCCC4=CN(CCCOCC#CC5=C(CN(C6CCC(NC6=O)=O)C7=O)C7=CC=C5)N=N4)=C3)C(C(NC8=CC=CC=C8)=O)=C1C(C)C	>3
14c	O[C@@H](C[C@H](CC(O)=O)O)CCN1C(C2=CC=C(F)C=C2)=C(C3=CC=CC(OCCCC4=CN(CCCCOCC#CC5=CC=CC6=C5CN(C7C(NC(CC7)=O)=O)C6=O)N=N4)=C3)C(C(NC8=CC=CC=C8)=O)=C1C(C)C	>3
14d	O[C@@H](C[C@H](CC(O)=O)O)CCN1C(C2=CC=C(F)C=C2)=C(C3=CC=CC(OCCCC4=CN(CCCCCOCC#CC5=C(CN(C6CCC(NC6=O)=O)C7=O)C7=CC=C5)N=N4)=C3)C(C(NC8=CC=CC=C8)=O)=C1C(C)C	0.3
14e	O[C@@H](C[C@H](CC(O)=O)O)CCN1C(C2=CC=C(F)C=C2)=C(C3=CC=CC(OCCCC4=CN(CCCCCCOCC#CC5=CC=CC6=C5CN(C7C(NC(CC7)=O)=O)C6=O)N=N4)=C3)C(C(NC8=CC=CC=C8)=O)=C1C(C)C	0.2
14f	O[C@@H](C[C@H](CC(O)=O)O)CCN1C(C2=CC=C(F)C=C2)=C(C3=CC=CC(OCCCC4=CN(CCCCCCCOCC#CC5=C(CN(C6CCC(NC6=O)=O)C7=O)C7=CC=C5)N=N4)=C3)C(C(NC8=CC=CC=C8)=O)=C1C(C)C	0.7
15a	O[C@@H](C[C@H](CC(O)=O)O)CCN1C(C2=CC=C(F)C=C2)=C(C3=CC=CC(OCCCC4=CN(CCOCCCC5=CC=CC6=C5CN(C7C(NC(CC7)=O)=O)C6=O)N=N4)=C3)C(C(NC8=CC=CC=C8)=O)=C1C(C)C	>3
15b	O[C@@H](C[C@H](CC(O)=O)O)CCN1C(C2=CC=C(F)C=C2)=C(C3=CC=CC(OCCCC4=CN(CCCOCCCC5=CC=CC6=C5CN(C7C(NC(CC7)=O)=O)C6=O)N=N4)=C3)C(C(NC8=CC=CC=C8)=O)=C1C(C)C	>3
15c	O[C@@H](C[C@H](CC(O)=O)O)CCN1C(C2=CC=C(F)C=C2)=C(C3=CC=CC(OCCCC4=CN(CCCCOCCCC5=CC=CC6=C5CN(C7C(NC(CC7)=O)=O)C6=O)N=N4)=C3)C(C(NC8=CC=CC=C8)=O)=C1C(C)C	>3
15d	O[C@@H](C[C@H](CC(O)=O)O)CCN1C(C2=CC=C(F)C=C2)=C(C3=CC=CC(OCCCC4=CN(CCCCCOCCCC5=CC=CC6=C5CN(C7C(NC(CC7)=O)=O)C6=O)N=N4)=C3)C(C(NC8=CC=CC=C8)=O)=C1C(C)C	2.3
15e	O[C@@H](C[C@H](CC(O)=O)O)CCN1C(C2=CC=C(F)C=C2)=C(C3=CC=CC(OCCCC4=CN(CCCCCCOCCCC5=CC=CC6=C5CN(C7C(NC(CC7)=O)=O)C6=O)N=N4)=C3)C(C(NC8=CC=CC=C8)=O)=C1C(C)C	0.5
15f	O[C@@H](C[C@H](CC(O)=O)O)CCN1C(C2=CC=C(F)C=C2)=C(C3=CC=CC(OCCCC4=CN(CCCCCCCOCCCC5=CC=CC6=C5CN(C7C(NC(CC7)=O)=O)C6=O)N=N4)=C3)C(C(NC8=CC=CC=C8)=O)=C1C(C)C	0.6
